# Supplementary material
Source: MDPI journal article supplement (https://www.mdpi.com/2073-4344/11/7/771)
Supplement: s1 [file s1 › catalysts-1244165-supplementary.pdf]

# The 'Green' Ni-UGSO Catalyst for the Hydrogen Production Under Various Reforming Regimes

Mostafa Chamoumi and Nicolas Abatzoglou

## Supplementary information

### A. Thermodynamics of DRM and SRM reactions

Figure S1 shows the evolutions of the free enthalpies of the  $\Delta G(T)$  reactions as a function of temperature for DRM and SRM calculated using the FactSage 7.0 software.

- For the reaction of DRM ( $\text{CH}_4 + \text{CO}_2 \rightarrow 2\text{CO} + 2\text{H}_2$ ), the variation of the free enthalpy with temperature is expressed by the relation:  $\Delta G(T)_{\text{DRM}} (\text{kJ/mol}) = -0.2835T + 259.56$  (Eq.17)
- The free enthalpy variation with temperature for the reaction of the SRM ( $\text{CH}_4 + \text{H}_2\text{O} \rightarrow \text{CO} + 3\text{H}_2$ ) is given below:  $\Delta G(T)_{\text{SRM}} (\text{kJ/mol}) = -0.2517T + 224.3$  (Eq.18)
- The  $\Delta G(T)$  measurements indicates that the DRM reaction is possible starting at 916K and that of the SRM at 891K ( $\Delta G \leq 0$ ) and upwards.
- It should be noted that throughout the temperature range studied, DRM and SRM have positive  $\Delta H(T)$  enthalpies values. This indicates that such reactions are endothermic: an external supply of heat is therefore necessary.

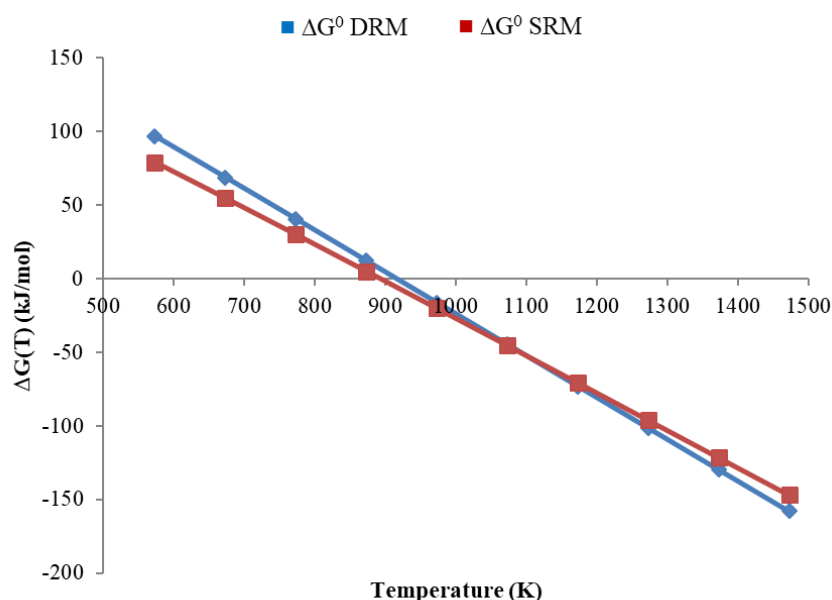

**Figure S1.** Evolution of free enthalpies ( $\Delta G(T)$ ) of DRM and SRM reactions as a function of temperature

The conversions of  $\text{CH}_4$  and  $\text{CO}_2$  as well as the compositions of gaseous mixtures ( $\text{H}_2$ ,  $\text{CO}$ ,  $\text{H}_2\text{O}$ ,  $\text{CH}_4$  and  $\text{CO}_2$ ) and graphitic carbon  $\text{C}$ , calculated at thermodynamic equilibrium between 973K and 1273K, are given in Figure S2 for the DRM reaction. Figure S3 shows the evolution of the  $\text{H}_2/\text{CO}$  ratio at thermodynamic equilibrium for DRM. The values indicated correspond to the molar composition of the mixture obtained from one mole of  $\text{CH}_4$  and one mole of  $\text{CO}_2$ .

At thermodynamic equilibrium, starting at 1123K, the DRM reaction shows a molar ratio of  $\text{H}_2/\text{CO} = 1$  and conversion rates of  $\text{CH}_4$  and  $\text{CO}_2$  of 97% and 95%. However, it is only at or above 1223K that there is no more formation of carbon.

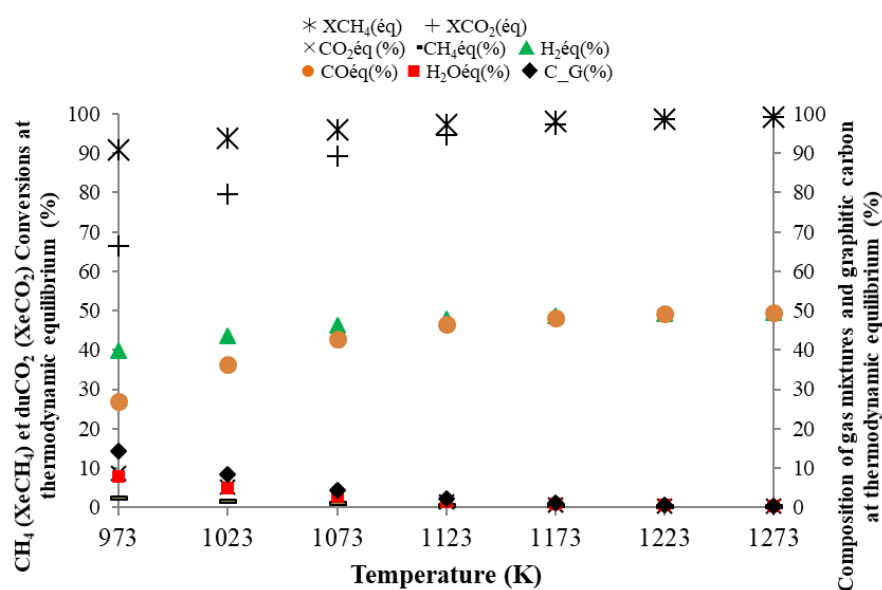

Figure S2.  $\text{CH}_4$  and  $\text{CO}_2$  conversions and composition of gas mixtures and graphitic carbon at thermodynamic equilibrium for the DRM reaction

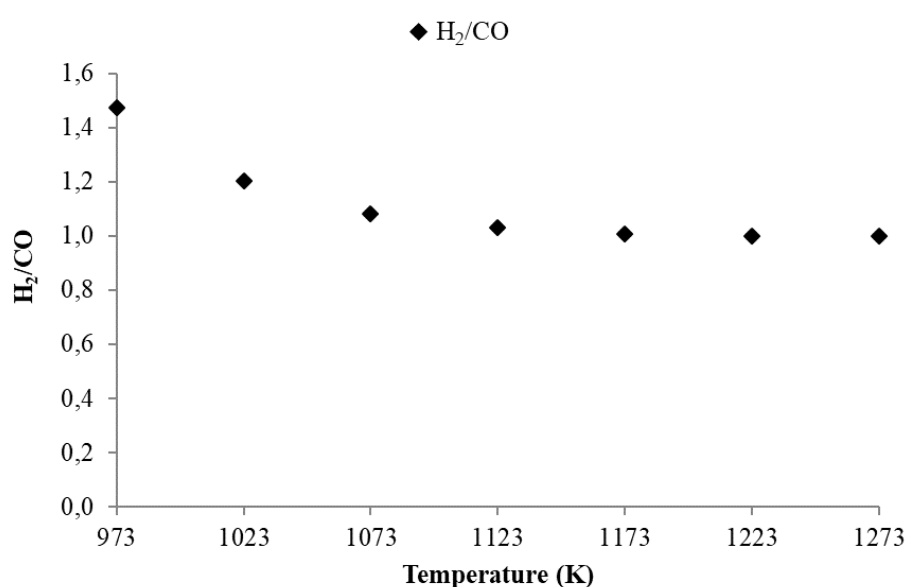

Figure S3. Thermodynamic equilibrium  $\text{H}_2/\text{CO}$  ratio for the DRM reaction

For the SRM reaction, conversion rates of  $\text{CH}_4$  and  $\text{H}_2\text{O}$  as well as compositions of gaseous mixtures ( $\text{H}_2$ ,  $\text{CO}$ ,  $\text{CO}_2$ ,  $\text{CH}_4$  and  $\text{H}_2\text{O}$ ) and graphitic carbon  $\text{C}$ , calculated at thermodynamic

equilibrium between 973K and 1273K, are given in Figure S4. Additionally, Figure S5 shows the evolution of the  $H_2/CO$  ratio at thermodynamic equilibrium for the SRM. The values indicated correspond to the molar composition of the mixture obtained from one mole of  $CH_4$  and one mole of  $H_2O$ .

At thermodynamic equilibrium, at or above 1123K, the SRM reaction shows a molar ratio of  $H_2/CO = 3$  and  $CH_4$  and  $H_2O$  conversion rates of 94% and 95% respectively. It should be noted that at or above this temperature (1123K), carbon formation no longer occurs.

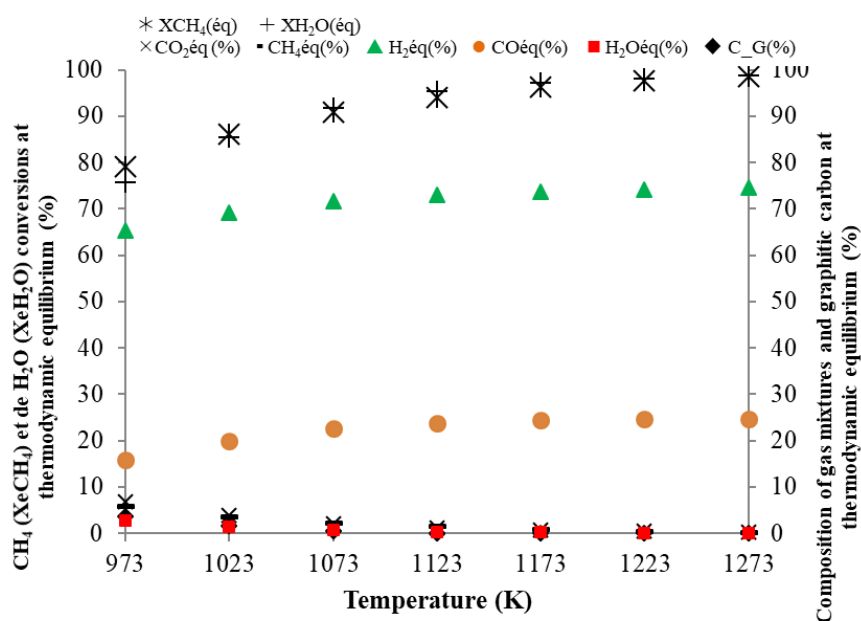

**Figure S4.**  $CH_4$  and  $CO_2$  conversions and composition of gas mixtures and graphitic carbon at thermodynamic equilibrium for the SRM reaction

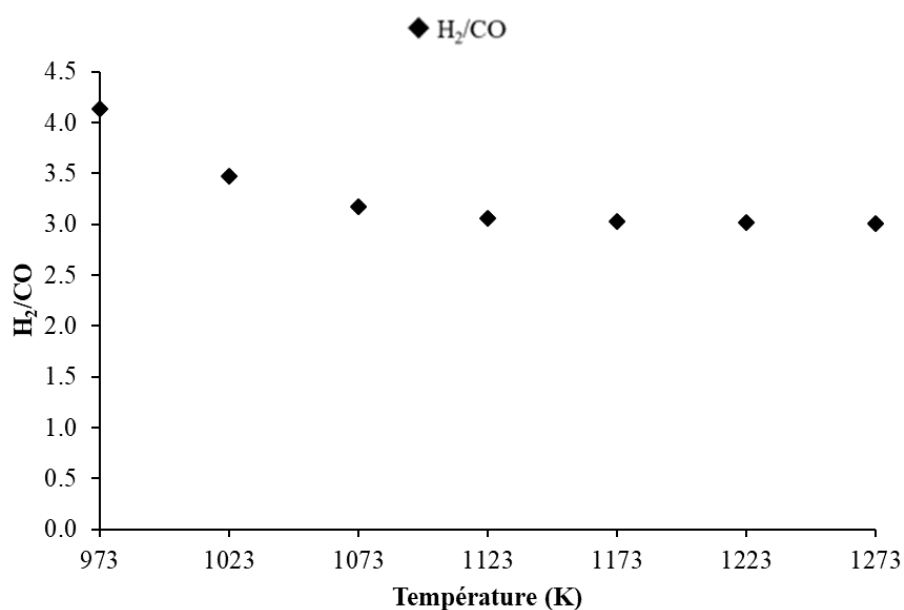

**Figure S5.** Thermodynamic equilibrium  $H_2/CO$  ratio for the SRM reaction

## B. Results

### *Influence of the active phase content on the catalytic activity*

Figure S6 shows the evolution of CO<sub>2</sub> conversions and Figure S7 and Figure S8 show the H<sub>2</sub> yield and the H<sub>2</sub>/CO ratio, respectively, along the reforming tests.

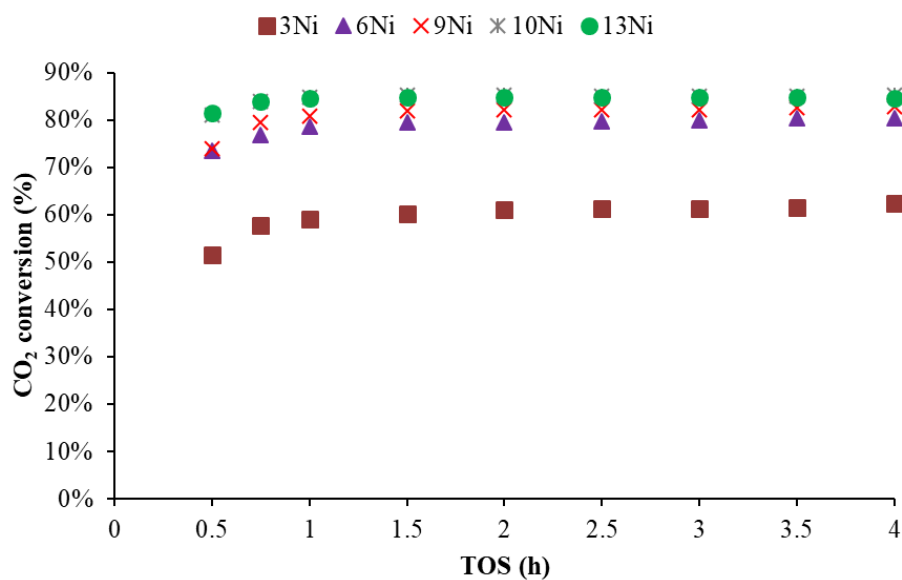

**Figure S6.** Effect of Ni content: evolution of CO<sub>2</sub> conversion as a function of time at 842°C, CO<sub>2</sub>/CH<sub>4</sub>=1.25

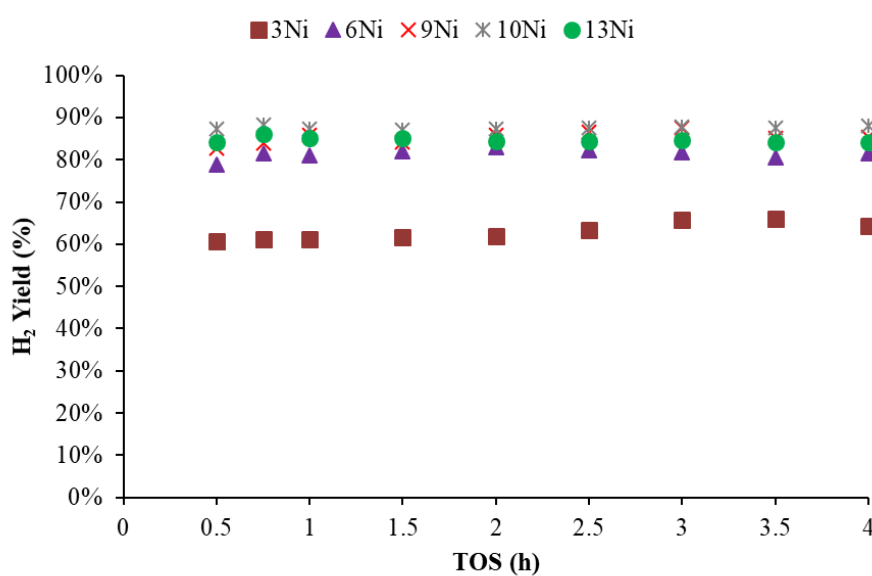

**Figure S7.** Effect of Ni content: evolution of H<sub>2</sub> yield as a function of time at 842°C, CO<sub>2</sub>/CH<sub>4</sub>=1.25

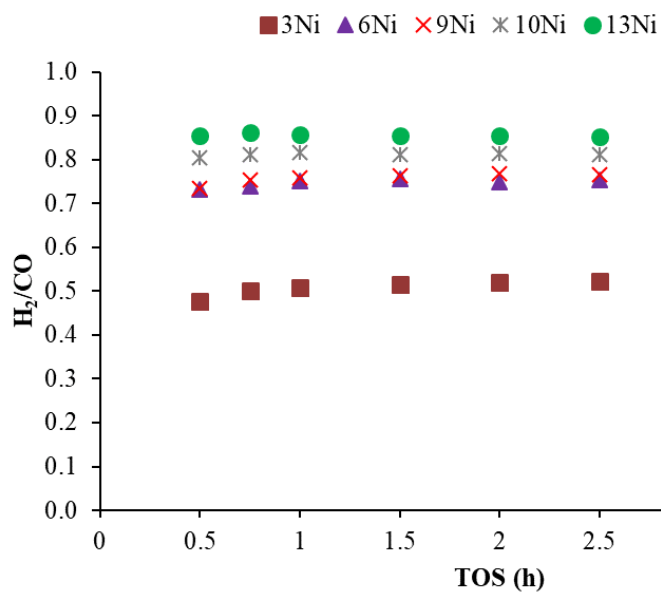

**Figure S8.** Effect of Ni content: evolution of  $H_2/CO$  ratio as a function of time at  $842^\circ C$ ,  $CO_2/CH_4=1.25$

Mapping study as function of Ni-loading: in all cases a good dispersion of the Ni

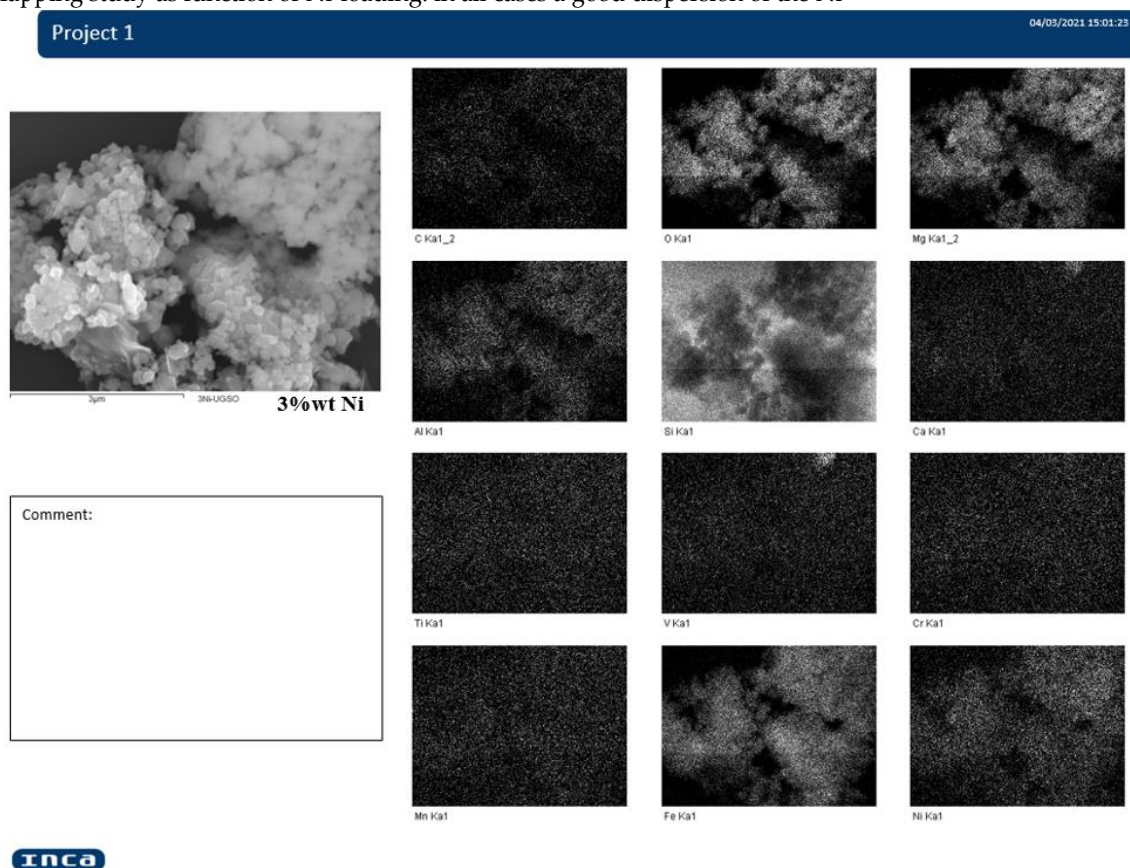

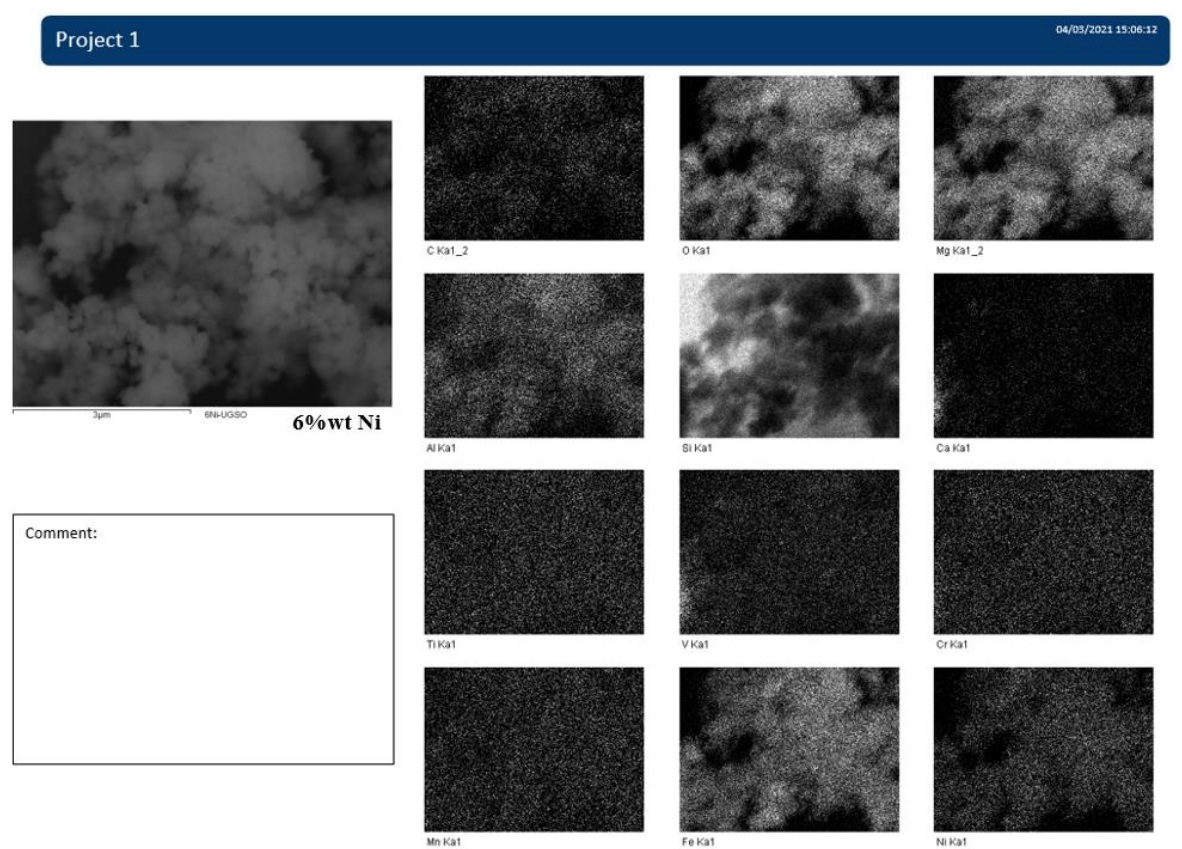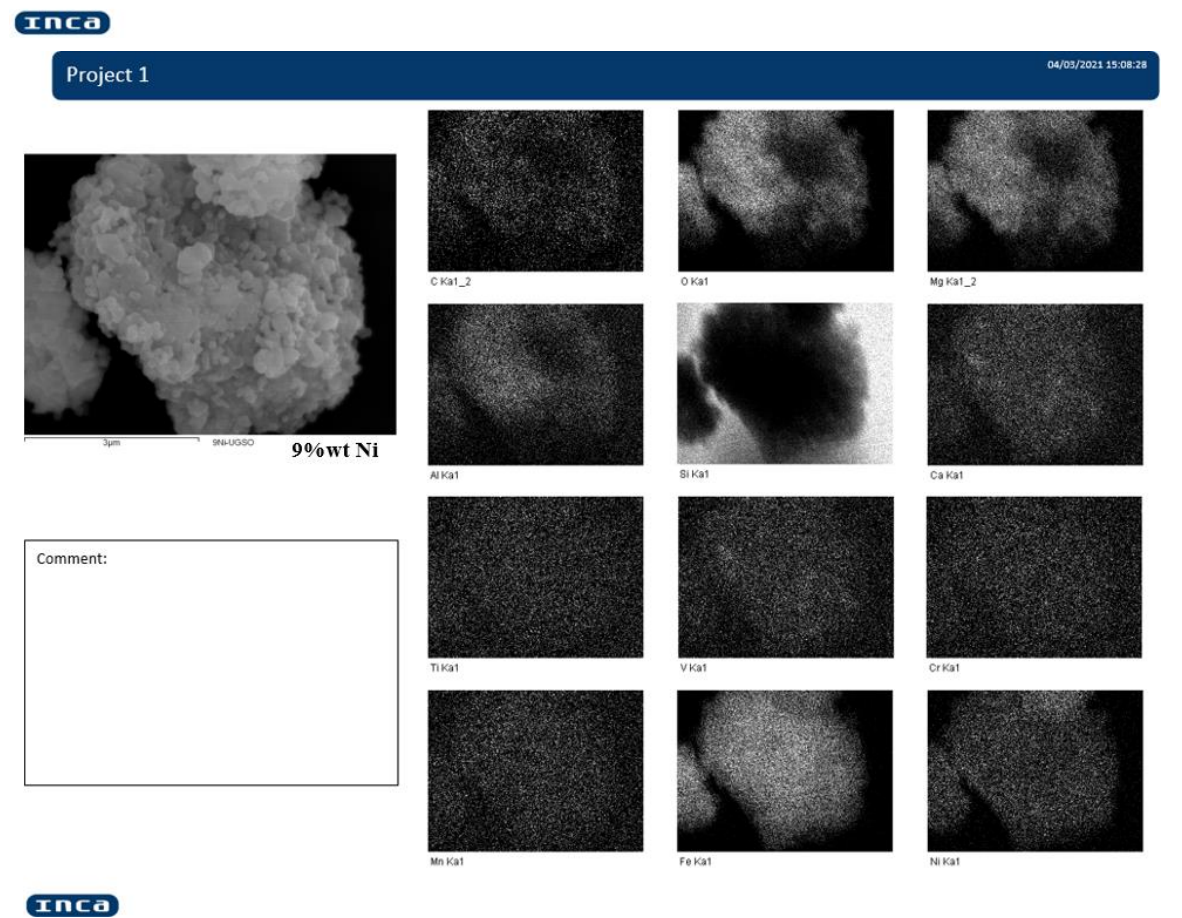

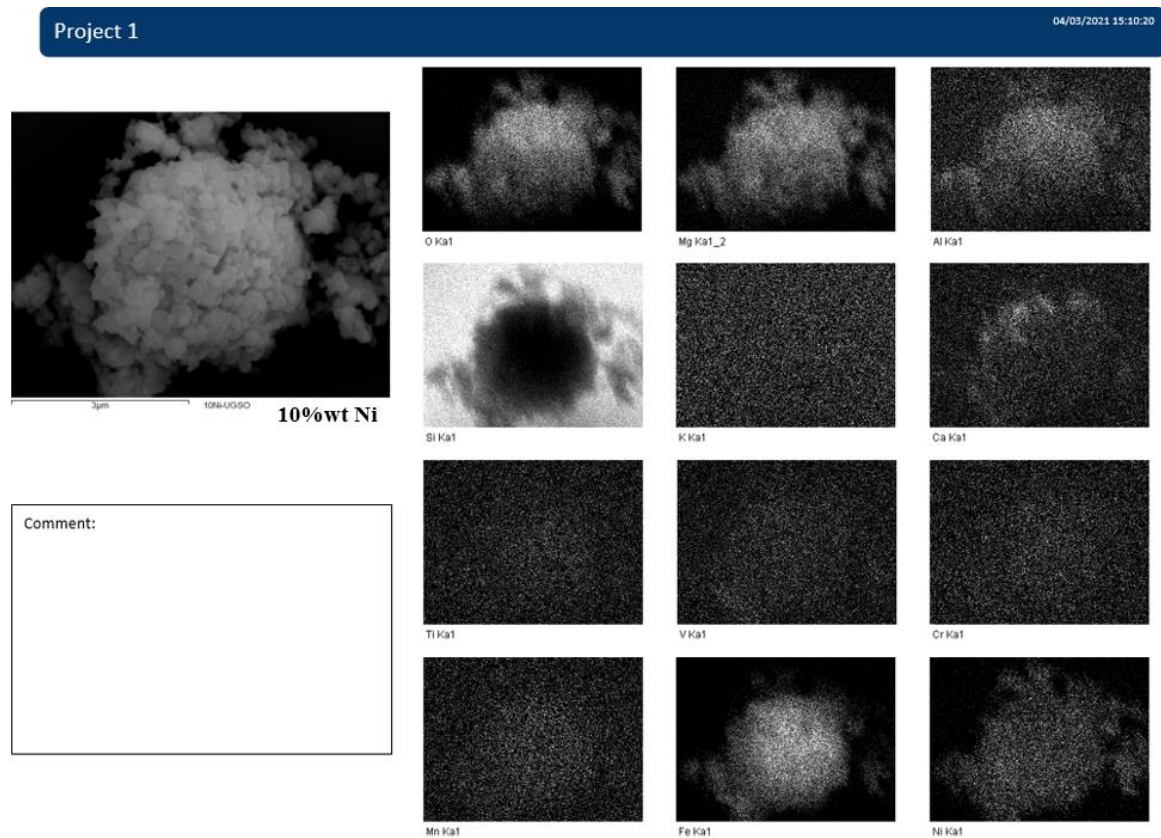**Inca**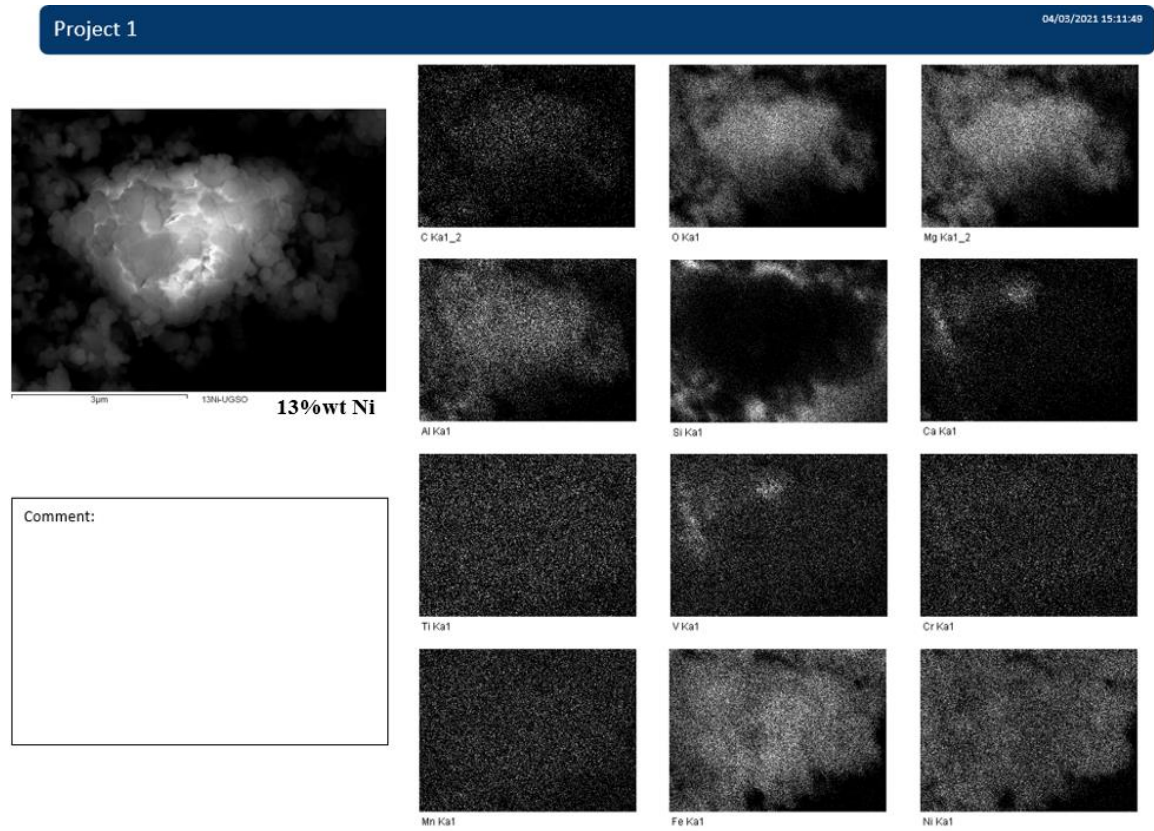**Inca****Figure S9.** Mapping study as function of Ni-loading

Influence of catalyst calcination time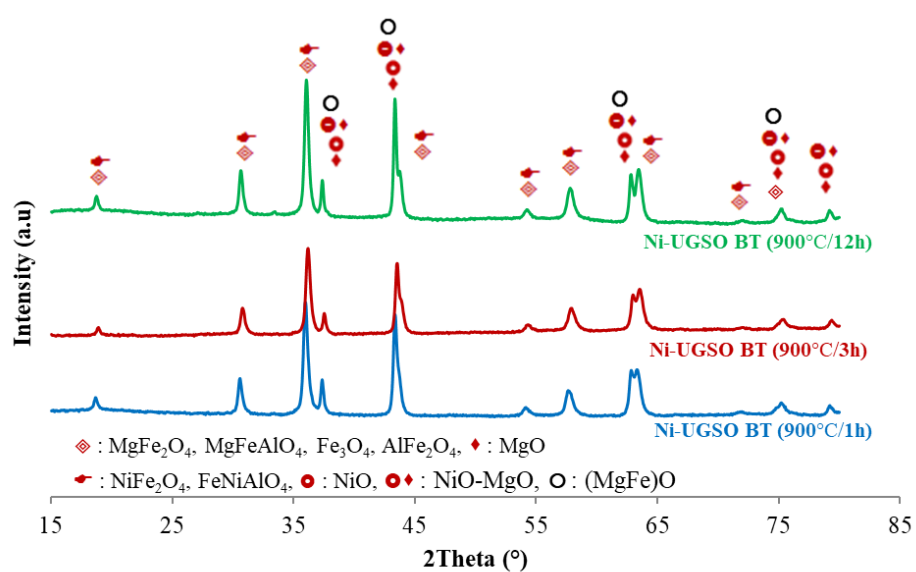**Figure S10.** XRD catalysts calcined at 900°C for 1h, 3h and 12h

*Representativeness of UGSO mining residue lots*

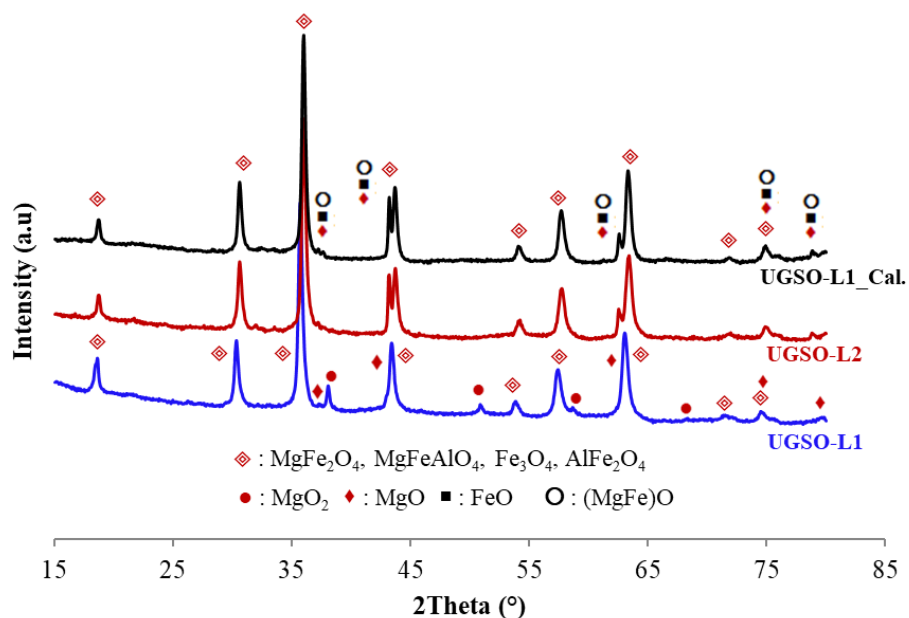

**Figure S11.** XRD of the two lots of UGSO compared to that of the UGSO L1 calcined at 900°C/12h

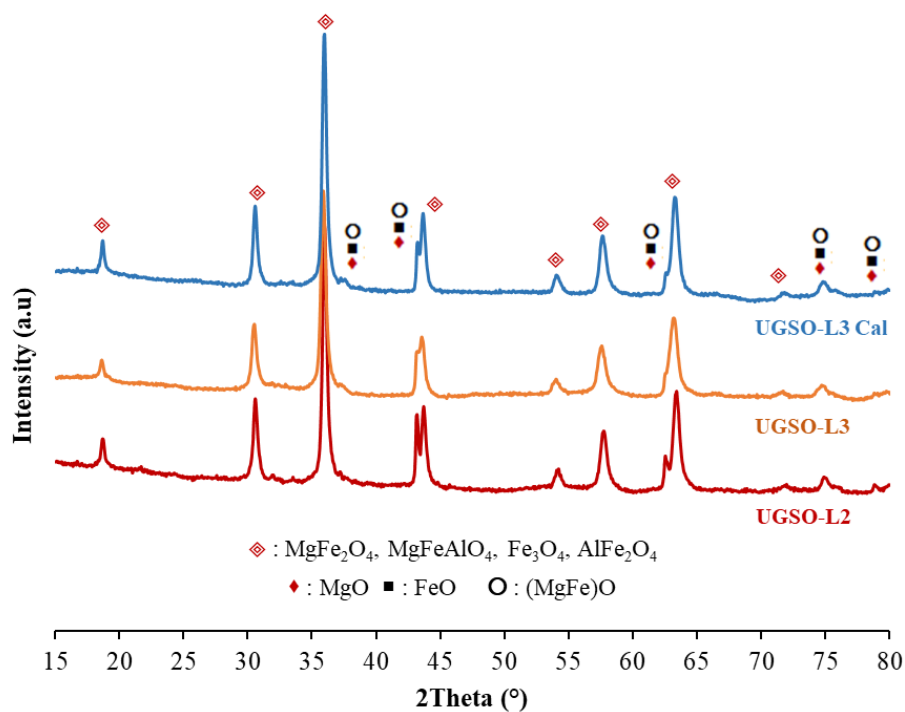

**Figure S12.** XRD of the of UGSO-L2 compared to that of the UGSO-L3 calcined at 900°C/12h

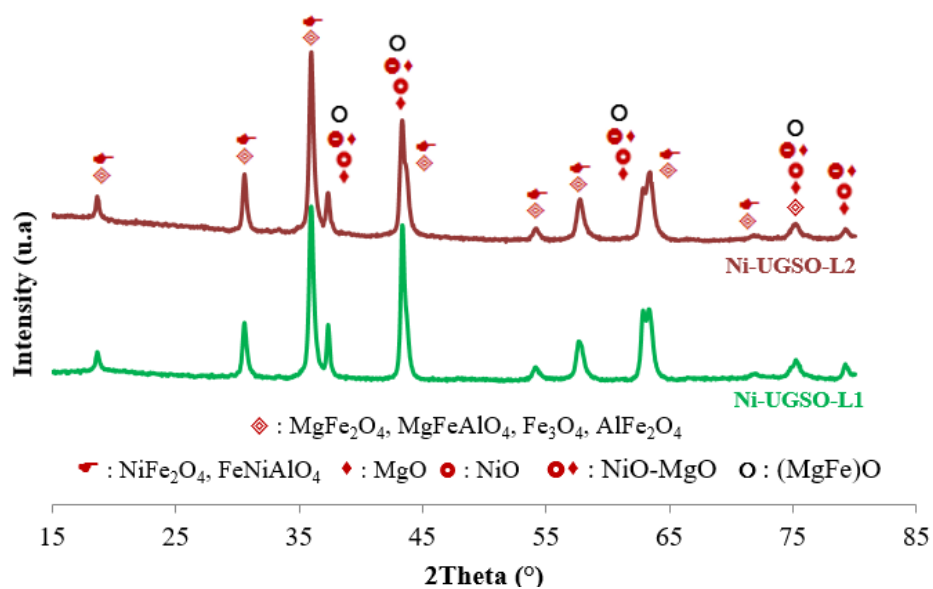

Figure S13. XRD of Ni-UGSO catalysts from 2 lots calcined at 900°C for 1h

#### Ni-UGSO sulfur poisoning resistance

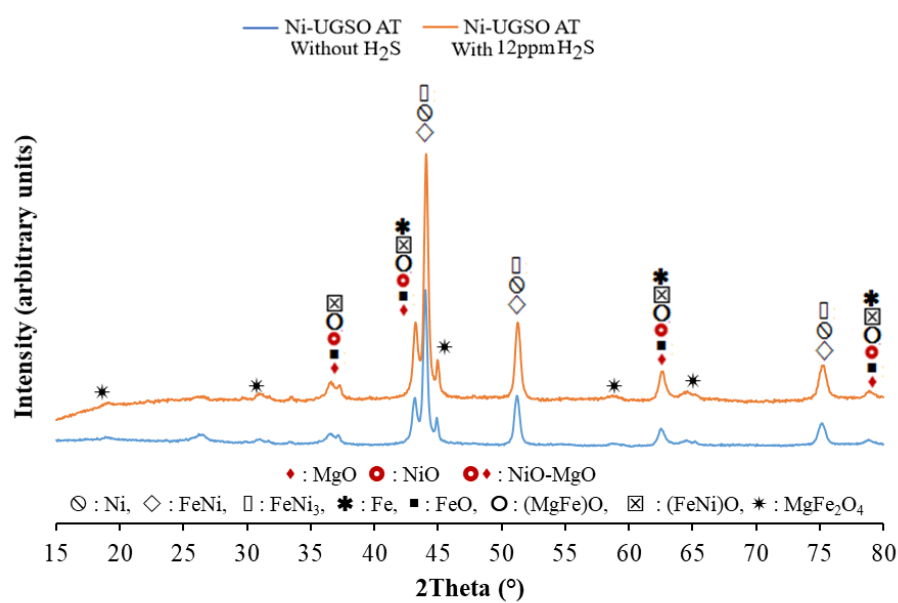

Figure S14. XRD of spent Ni-UGSO catalysts without and with  $\text{H}_2\text{S}$

*Ni-UGSO performance as a catalyst for steam methane reforming (SRM)*

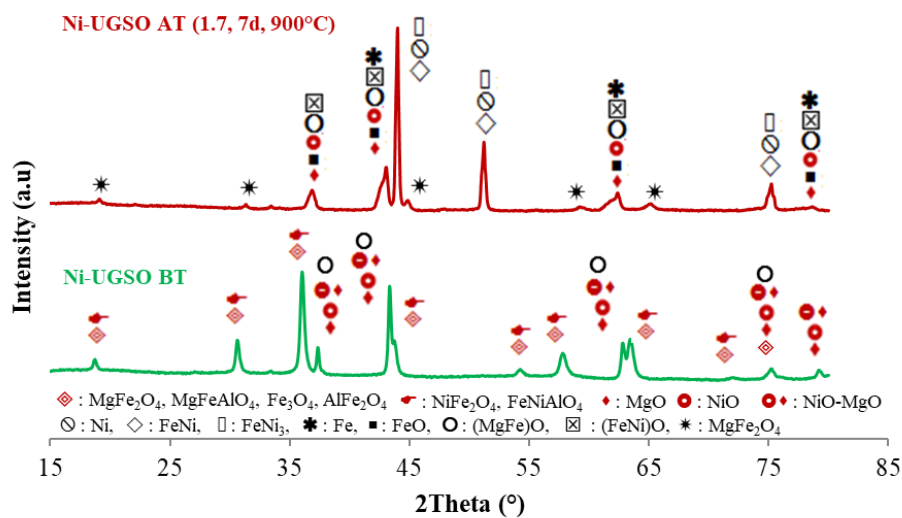

**Figure S15.** XRD of Ni-UGSO used for 7 days at the SRM ( $\text{H}_2\text{O}/\text{CH}_4=1.7$ , 900°C) compared to the fresh catalyst Ni-UGSO BT

*Ni-UGSO performance as a catalyst for mixed methane dry and steam reforming*

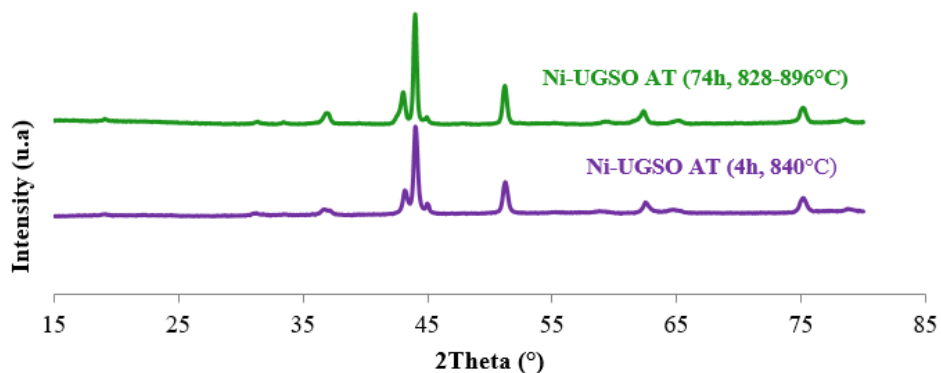

**Figure S16.** XRD of used catalyst Ni-UGSO AT (4h & 74h) ( $\text{CO}_2/\text{CH}_4 = 0.97$  and  $\text{H}_2\text{O}/\text{CH}_4 = 0.15$ )

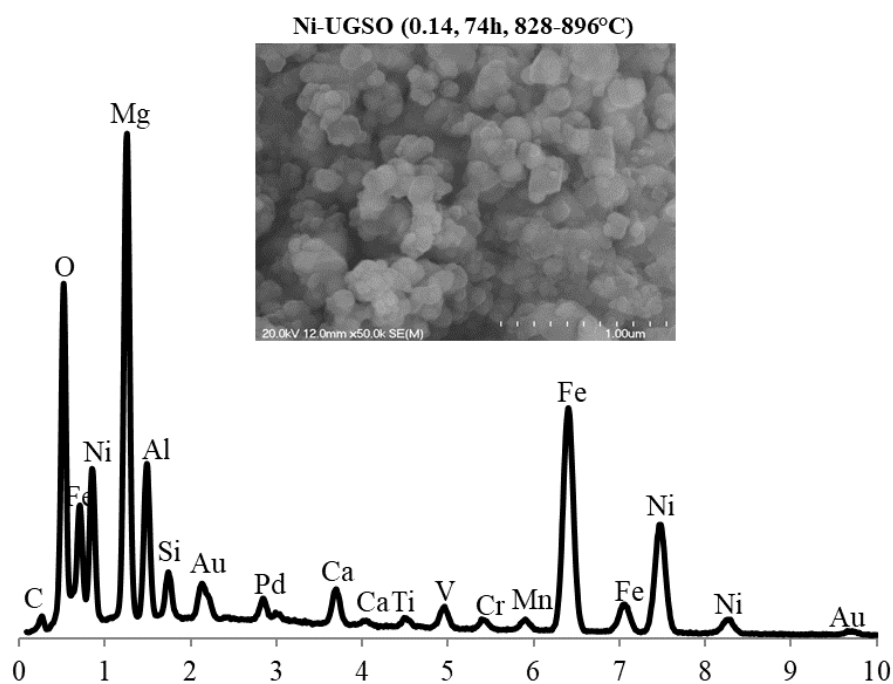

**Figure S17.** SEM-EDX of used catalyst Ni-UGSO AT (4h & 74h) ( $\text{CO}_2/\text{CH}_4 = 0.97$  and  $\text{H}_2\text{O}/\text{CH}_4 = 0.15$ )
